# Supplementary material for: HPV-mediated regulation of SMAD4 modulates the DNA damage response in head and neck cancer
Source: Springer Nature journal article supplement (doi:10.1186/s13046-022-02258-9), 2022-02-10
Supplement: MOESM1 [file 20122326]

**Figure S**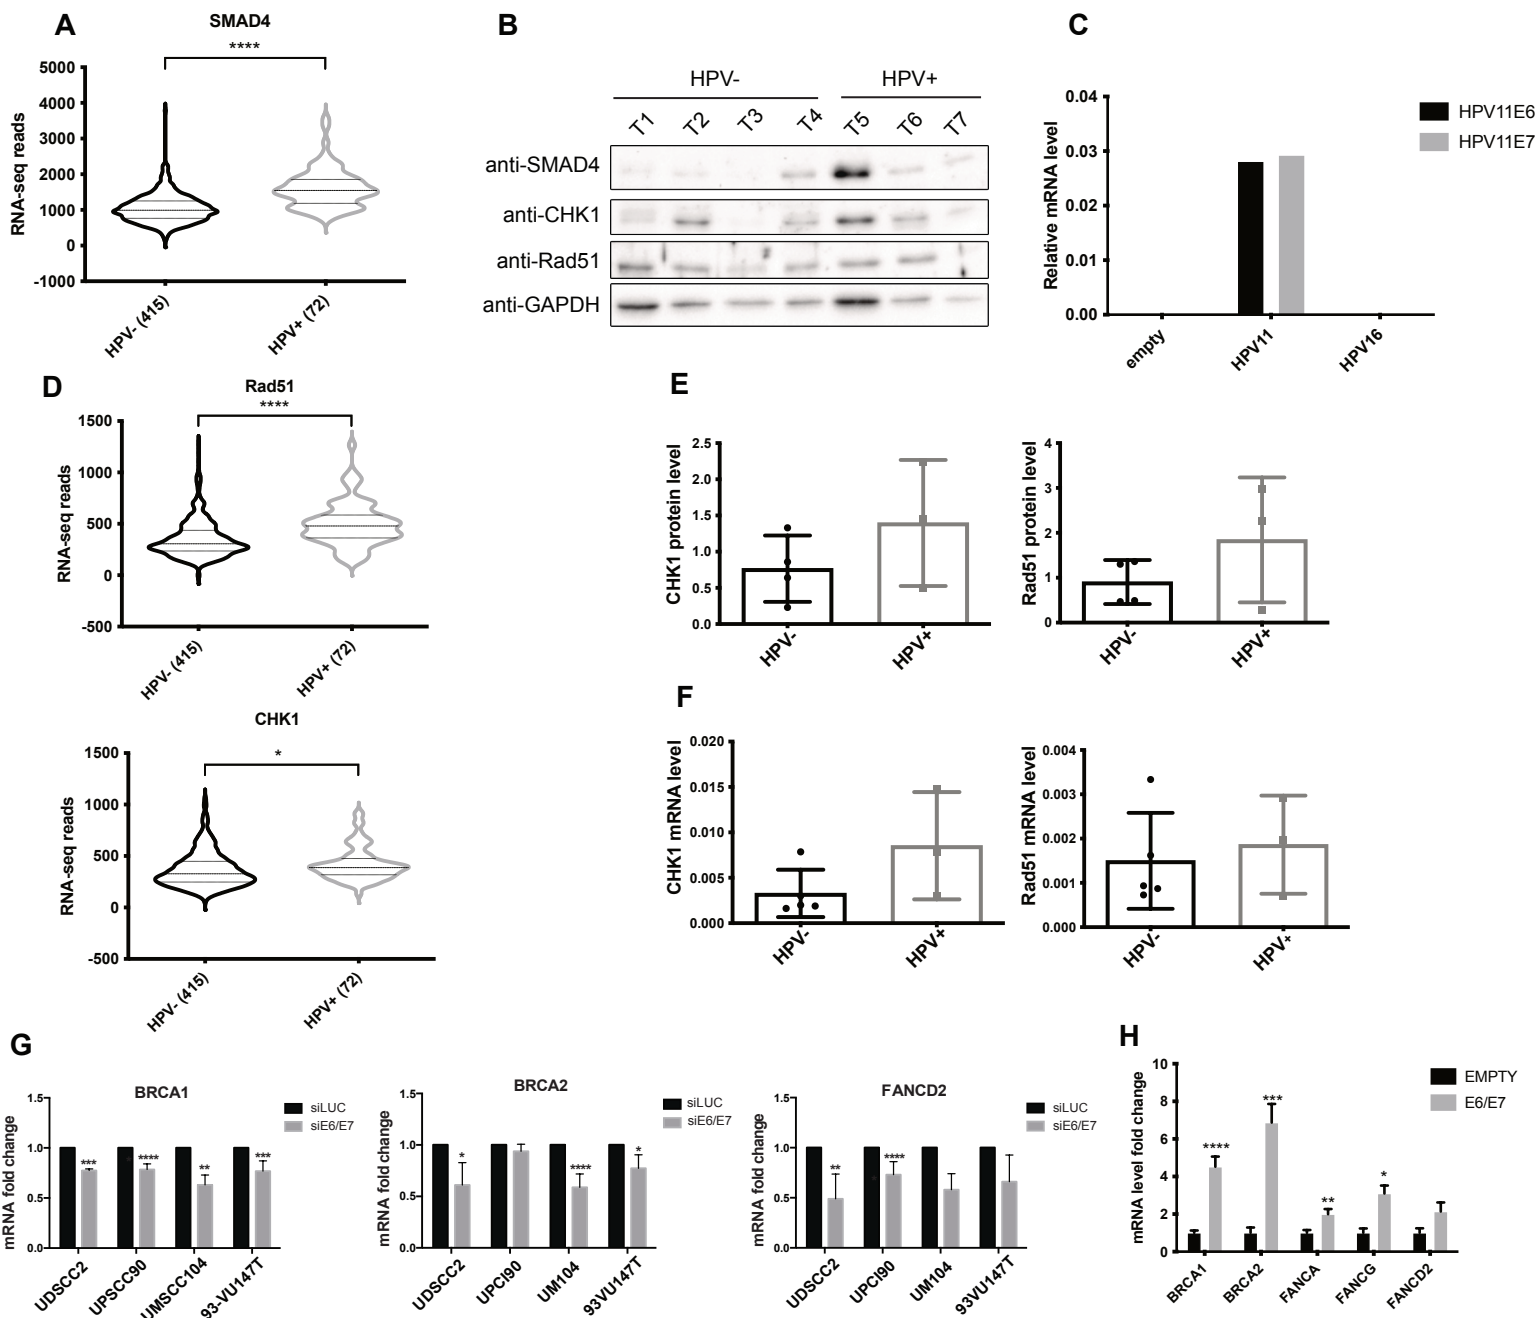

**Figure S.** (A) Normalized RNA-seq data for SMAD4 were extracted from the TCGA PanCancer Atlas and divided in HPV+ and HPV- HNC cohorts. Numbers in brackets refer to the number of samples included in each analysis. \*\*\*\*,  $P < 0.0001$  (unpaired t test). (B) Protein fraction was extracted from frozen tissue samples of 4 HPV-negative and 3 HPV-positive HNC patients and analysed by immunoblotting with the indicated antibodies. (C) HKs were transduced with empty or HPV16 E6/E7 or HPV11 E6/E7 recombinant retroviral vectors. After selection with G418 cells were harvested total RNAs were isolated for RT-qPCR. HPV11 E6/E7 expression was normalized to RplP0. (D) Normalized RNA-seq data for SMAD4 was extracted from the TCGA PanCancer Atlas and divided in HPV+ and HPV- HNC cohorts. Numbers in brackets refer to the number of samples included in each analysis. \*,  $P < 0.05$ ; \*\*\*\*,  $P < 0.0001$  (unpaired t test). (E) Box plot showing means  $\pm$  SD and individual values Optical density analysis of the expression of CHK1 and Rad51 from frozen tissue samples of 4 HPV-negative and 3 HPV-positive HNC patients. (F) Total RNAs from frozen tissue samples of 5 HPV-negative and 3 HPV-positive HNC patients were isolated for RT-qPCR. CHK1 and Rad51 expression was normalized to RplP0 and shown as Box plot of the means  $\pm$  SD and individual values. (G) HNC HPV-positive cell lines were transfected with specific siRNA against HPV16 E6/E7 or Luciferase as control. 72h after transfection cells total RNAs were isolated for RT-qPCR and reported as means  $\pm$ SD of fold changes of at least three independent experiments. (H) HKs were transduced with empty or HPV16 E6/E7 recombinant retroviral vectors. After selection with G418 cells were harvested total RNAs were isolated for RT-qPCR. DDR gene expression was normalized to RplP0. Results from at least three independent experiments are expressed as means  $\pm$ SD of fold changes. \*\*,  $P < 0.01$ ; \*\*\*,  $P < 0.001$ ; \*\*\*\*,  $P < 0.0001$  (unpaired t test).
